# Supplementary material for: Synergistic effect of copolymeric resin grafted 1,2-benzisothiazol-3(2H)-one and heterocyclic groups as a marine antifouling coating
Source: Royal Society of Chemistry journal article supplement (doi:10.1039/d1ra01826d), 2021-01-01

Supporting Information

**Synergistic effect of copolymeric resin  
grafted 1,2-benzisothiazol-3(2H)-one and  
heterocyclic groups as marine antifouling  
coating**

Miao Dong,<sup>a,b</sup>Zheng Liu,<sup>b</sup> Yuxing Gao,<sup>a</sup> Xuemei Wang,<sup>b</sup>Junhua Chen<sup>a,b</sup>and Jianxin

Yang<sup>\*a,b</sup>

a. Key Laboratory of Green Catalysis and Reaction Engineering of Haikou;

College of Science, Hainan University, Haikou 570228, P. R. China.

b. Hainan Provincial Fine Chemical Engineering Research Center, Hainan

University, Haikou, 570228, P. R. China.



# $^1\text{H}$ NMR (400 MHz, DMSO- $d_6$ ) for 2-Acryloylbenzoxazole (HMR<sub>1</sub>)

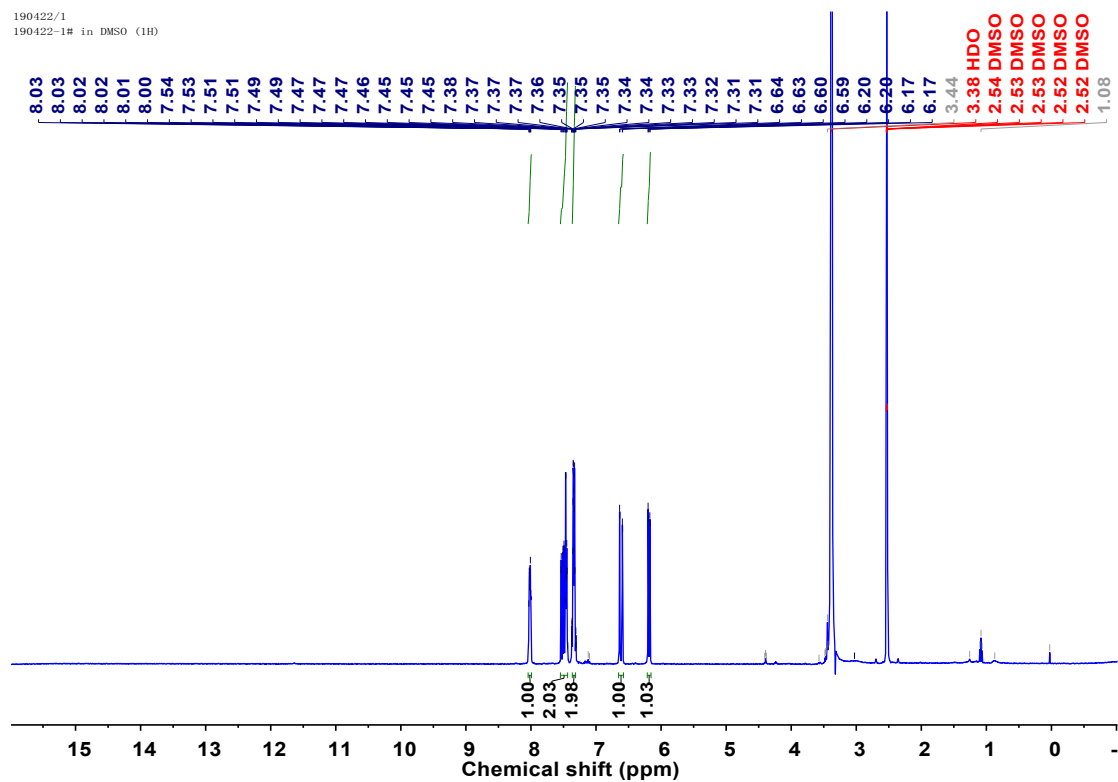

# IR for 2-Acryloylbenzoxazole (HMR<sub>1</sub>)

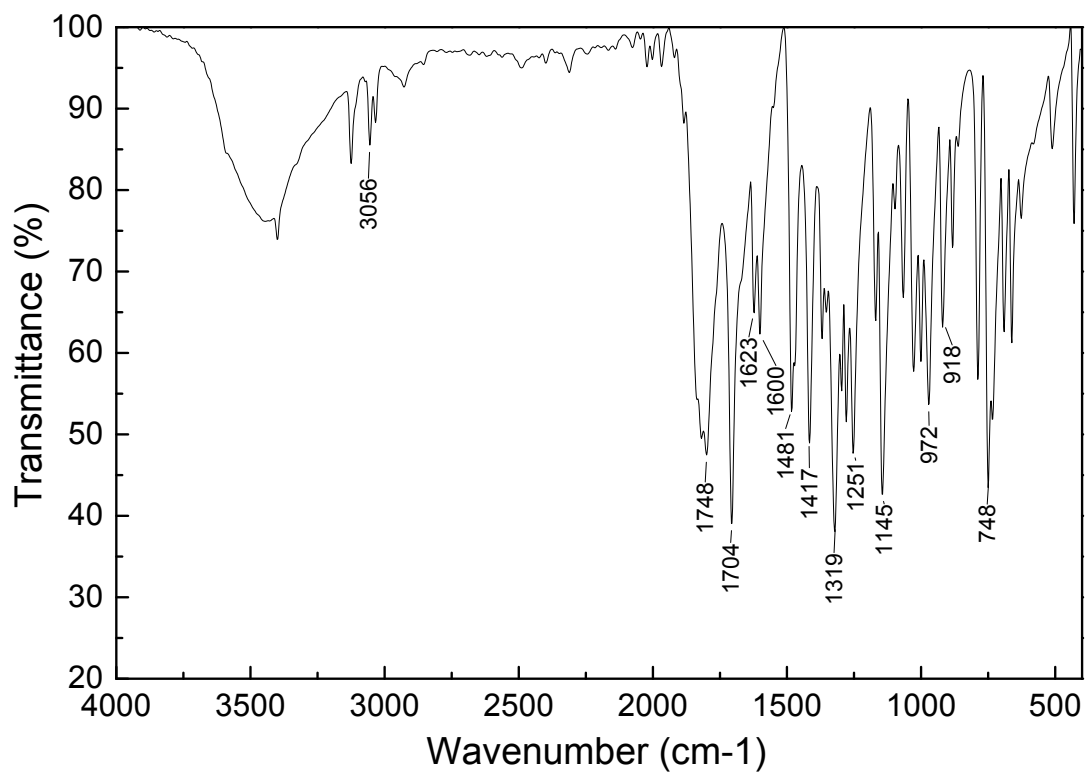

# $^1\text{H}$ NMR (400 MHz, DMSO- $d_6$ ) for 2-Acryloxy pyridine ( $\text{HMR}_2$ )

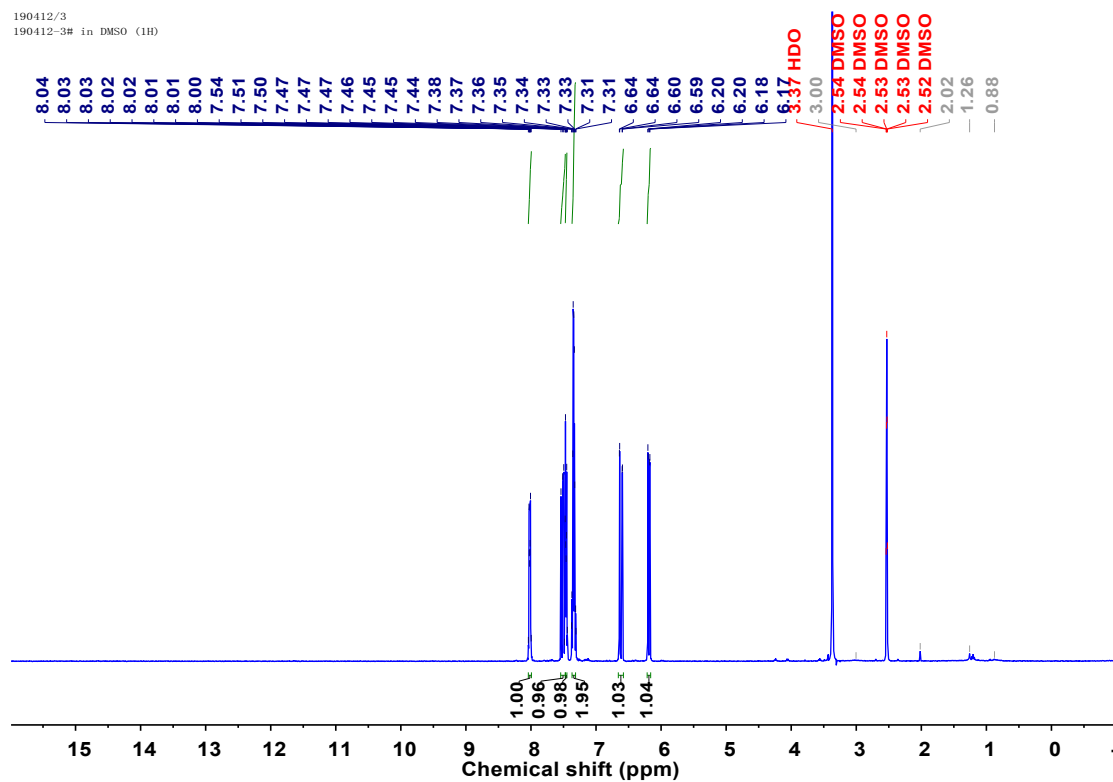

# IR for 2-Acryloxy pyridine ( $\text{HMR}_2$ )

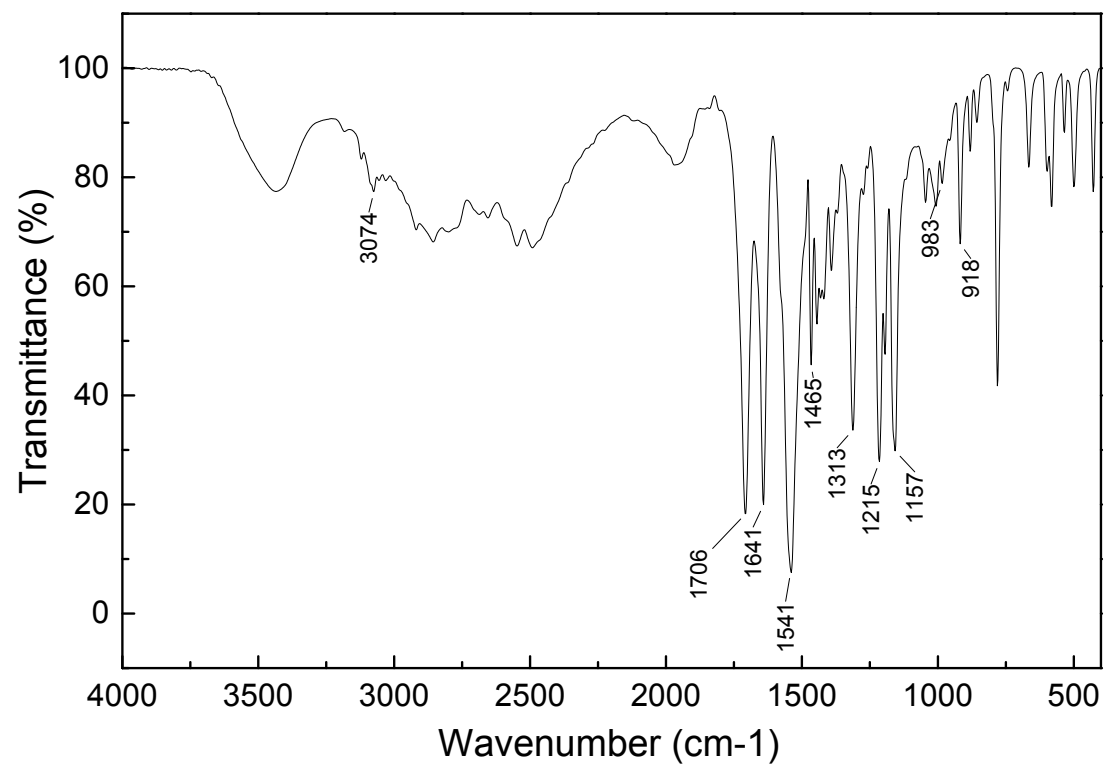

# $^1\text{H}$ NMR (400 MHz, DMSO- $d_6$ ) for 2-Acrylamide-6-chlorobenzothiazole (HMR<sub>3</sub>)

190428/2  
190428-2# in DMSO (1H)

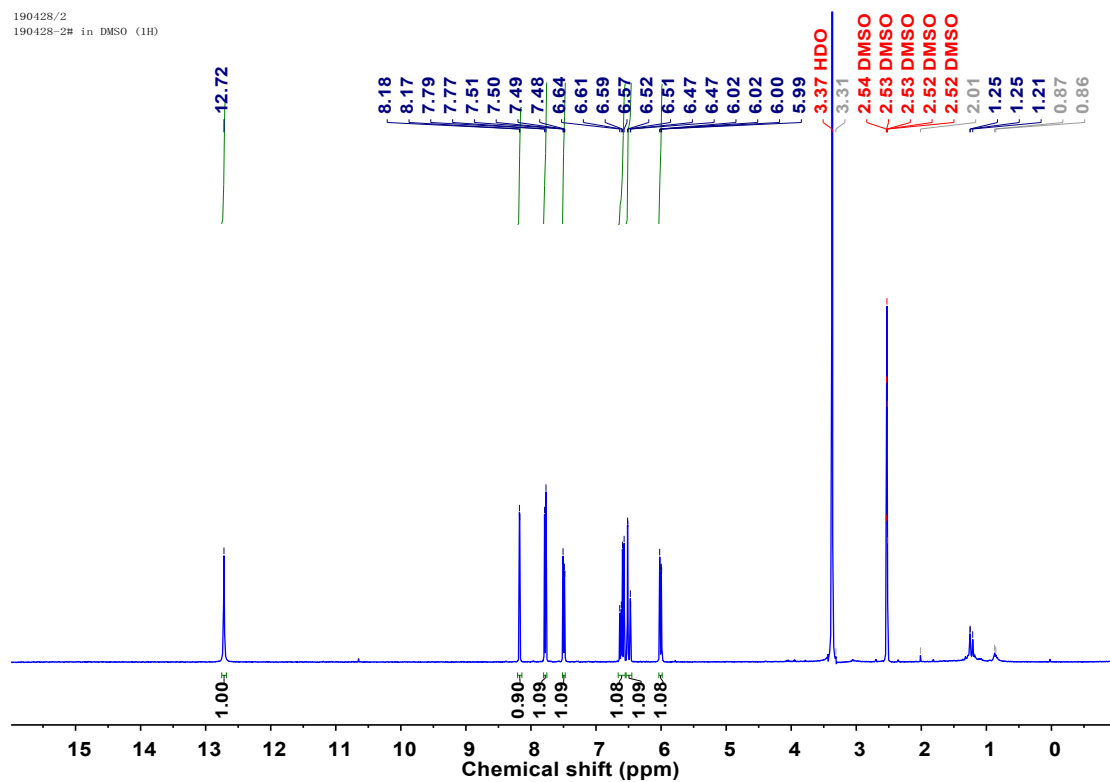

# IR for 2-Acrylamide-6-chlorobenzothiazole (HMR<sub>3</sub>)

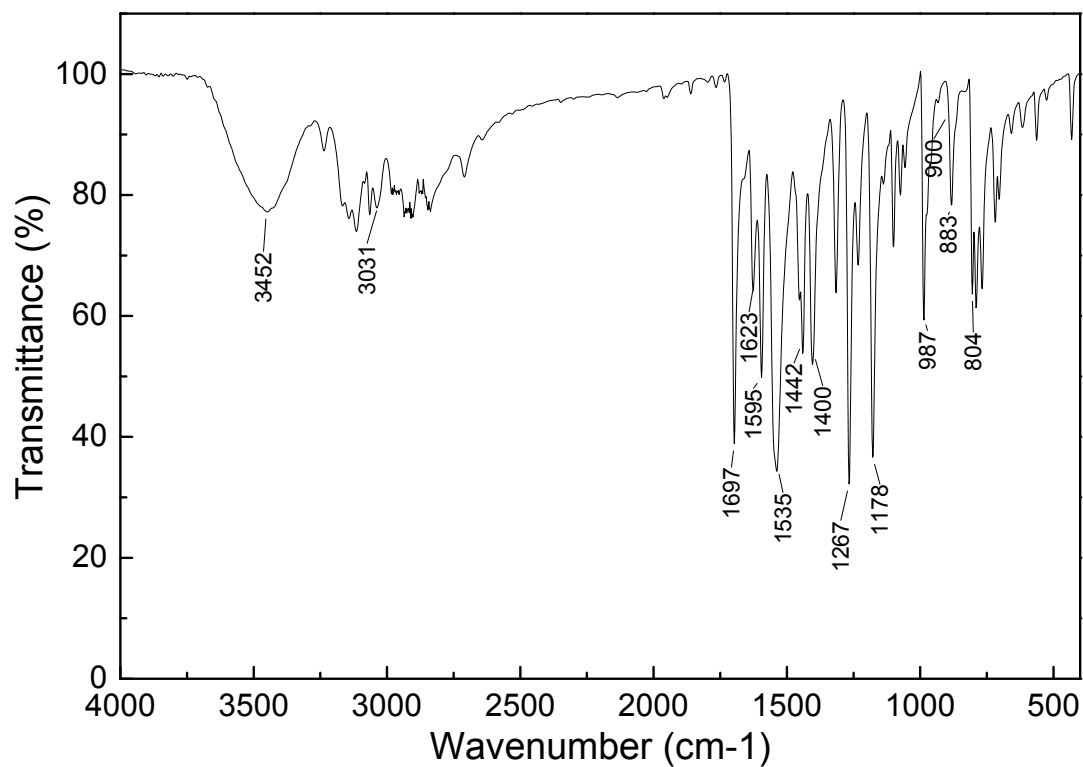

# $^1\text{H}$ NMR (400 MHz, $\text{DMSO-}d_6$ ) for 2-Acrylamide-6-methylbenzothiazole ( $\text{HMR}_4$ )

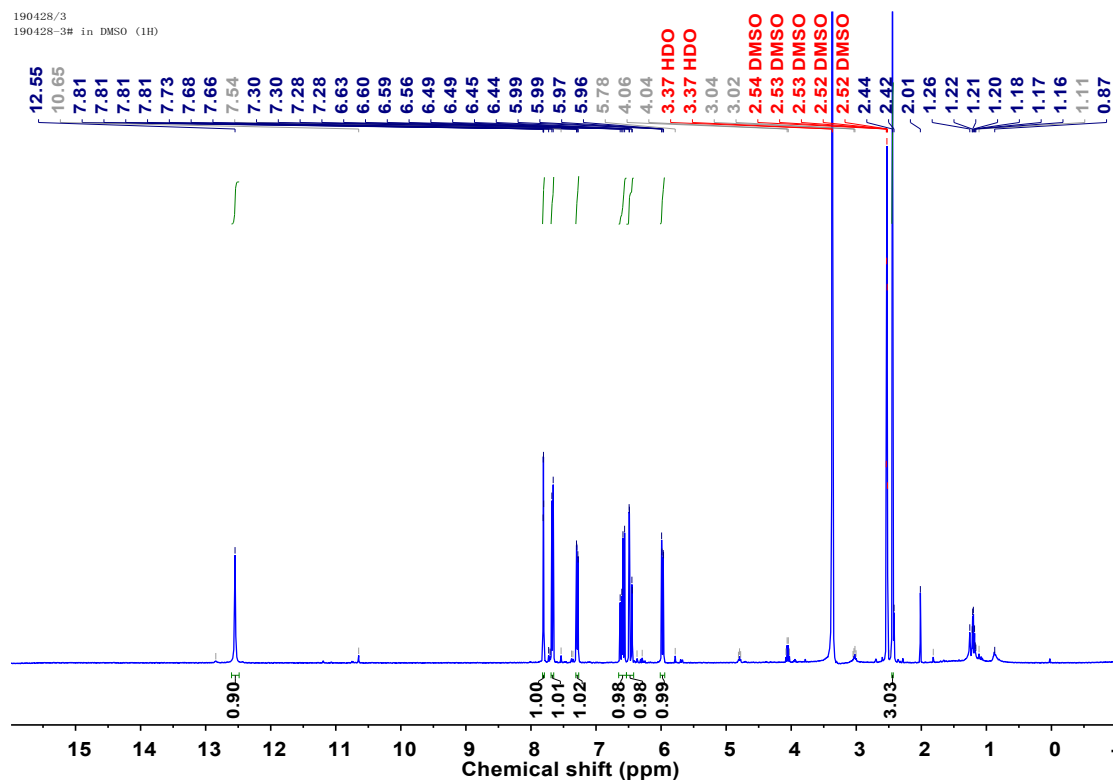

# IR for 2-Acrylamide-6-methylbenzothiazole ( $\text{HMR}_4$ )

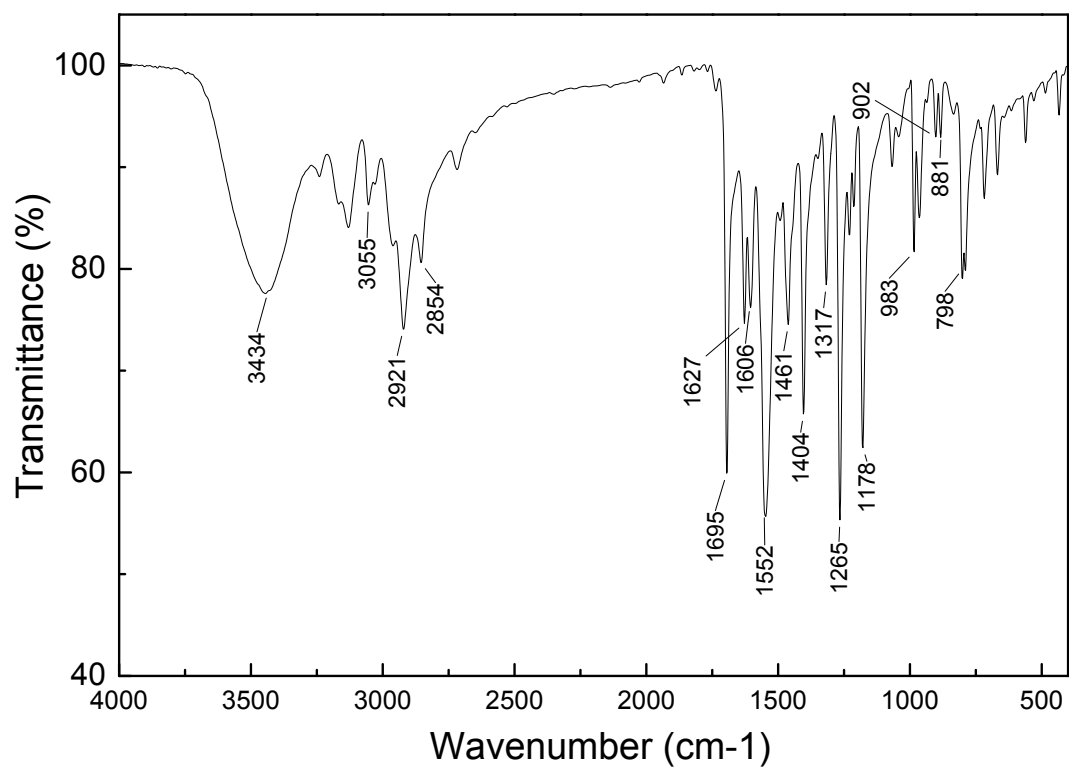

## IR spectra of copolymer PBH:

IR for copolymer PBH5

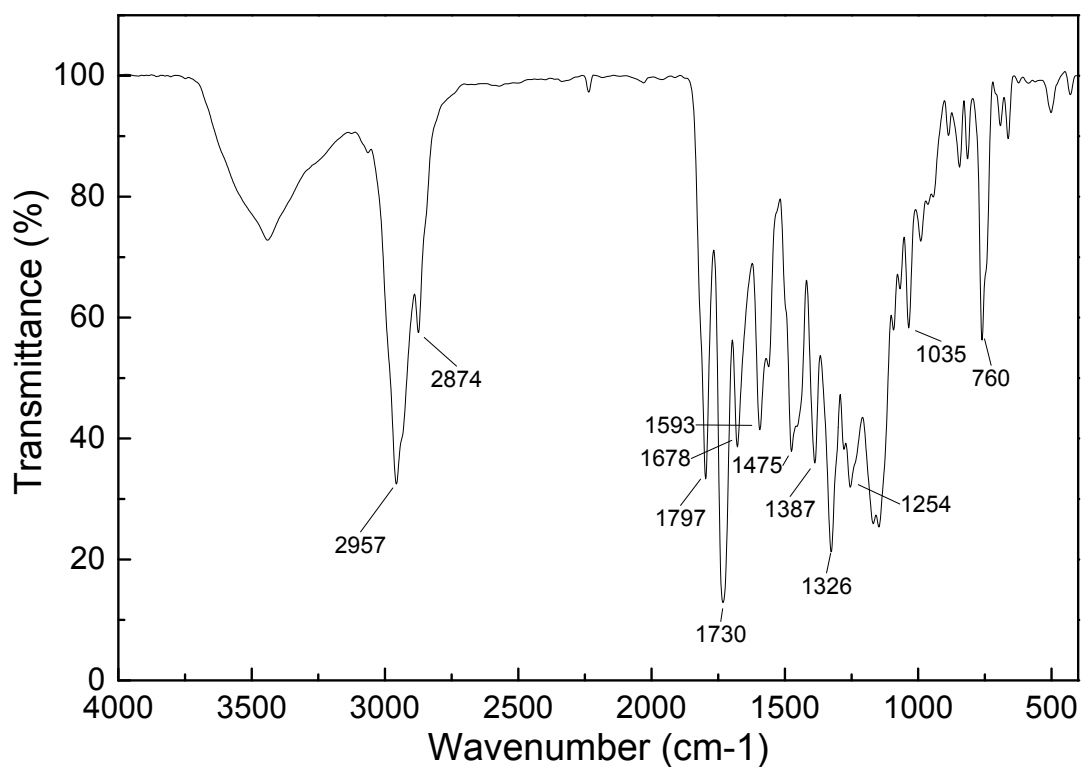

IR for copolymer PBH6

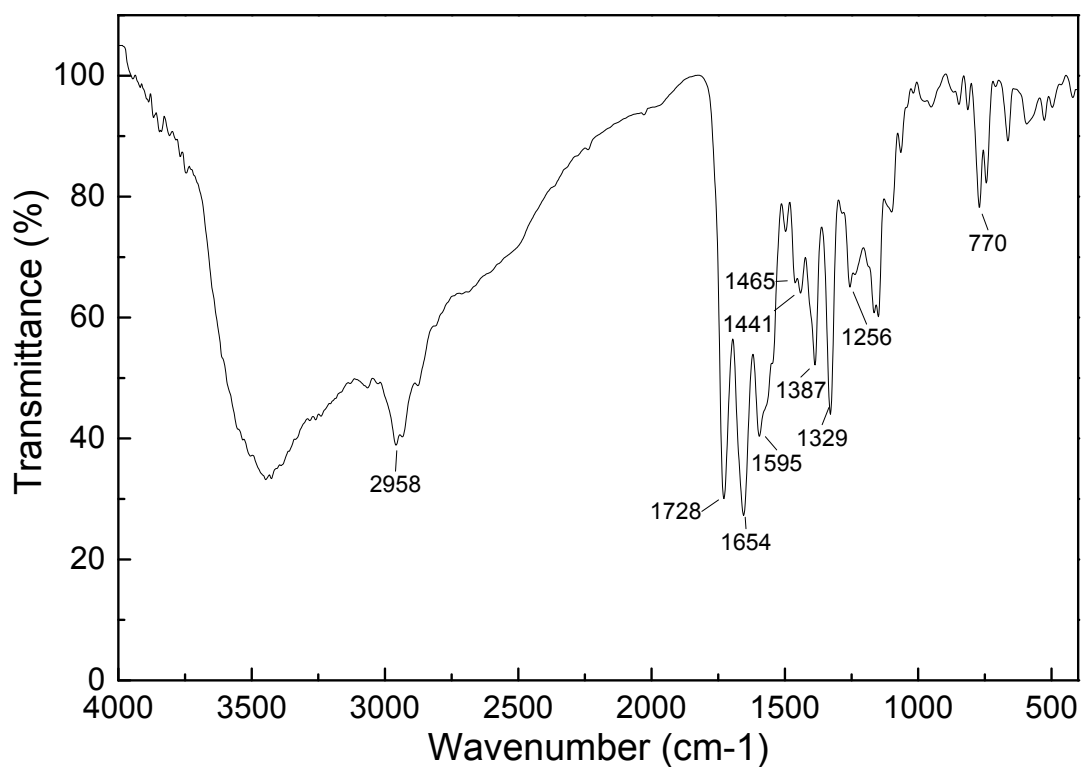

IR for copolymer PBH7

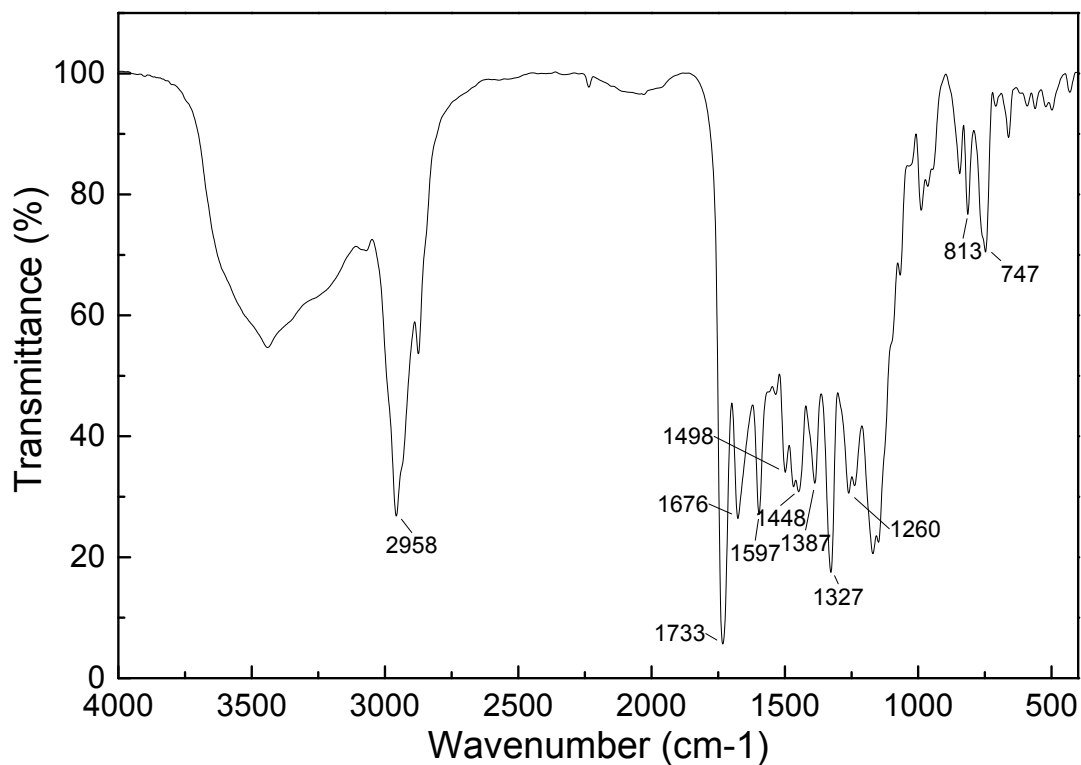

IR for copolymer PBH8

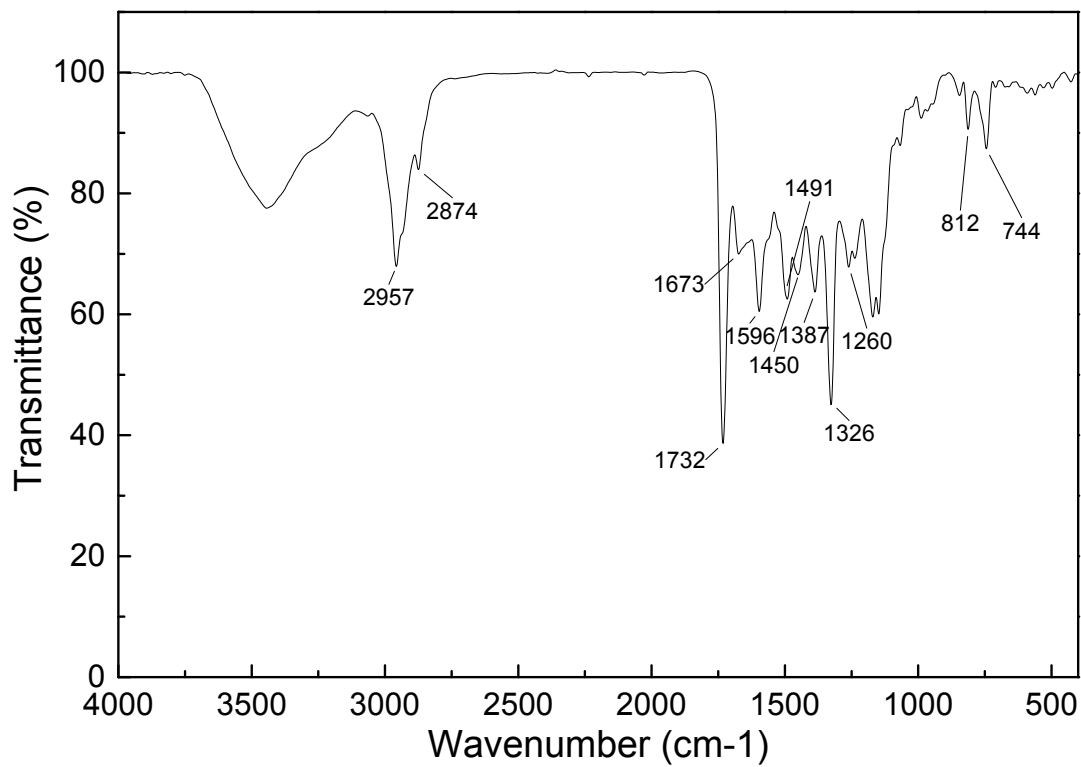

Supplement: d1ra01826d1.pdf [file d1ra01826d1.pdf]
